# Supplementary material
Source: publisher figshare collection journal article supplement (https://tandf.figshare.com/articles/dataset/_/7037558)
Supplement: Supplementary file 1 [file 1]

Archive with 2 entries (2 files):
- Supplement Table A.pdf
- Supplement Table B.pdf
