# Supplementary material
Source: publisher figshare collection journal article supplement (https://tandf.figshare.com/articles/dataset/_/7037558)
Supplement: Supplementary file 1 [file 1 › Supplement Table A.pdf]

Supplement Table A. Characteristics of the 68 patients developing local recurrence.

| <b>Tumor Height</b>     | <b>n (%)</b> |
|-------------------------|--------------|
| <b>High</b>             | 22           |
| <b>Mid</b>              | 21           |
| <b>Low</b>              | 23           |
| <b>Preoperative CRT</b> |              |
| <b>Yes</b>              | 19           |
| <b>No</b>               | 40           |
| <b>R-status</b>         |              |
| <b>R0</b>               | 48           |
| <b>R1</b>               | 8            |
| <b>(y)pT</b>            |              |
| <b>-&gt; T0</b>         | 0 (0.0)      |
| <b>-&gt; T1</b>         | 3 (4.4)      |
| <b>-&gt; T2</b>         | 13 (19.1)    |
| <b>-&gt; T3</b>         | 41 (60.3)    |
| <b>-&gt; T4</b>         | 11 (16.2)    |
| <b>(y)pN</b>            |              |
| <b>-&gt; N0</b>         | 32 (47.1)    |
| <b>-&gt; N1</b>         | 15 (22.1)    |
| <b>-&gt; N2</b>         | 21 (30.9)    |

CRT, Chemoradiotherapy. pT, histopathological tumour category. pN, histopathological nodal-category. Y-prefix, patients who were preoperatively treated. 2 patients had no tumour height recorded. 9 patients with a local recurrence had missing data regarding CRT. 12 patients had no R-status recorded.
