# Supplementary material
Source: publisher figshare collection journal article supplement (https://tandf.figshare.com/articles/dataset/_/7037558)
Supplement: Supplementary file 1 [file 1 › Supplement Table B.pdf]

Supplement Table B. Factors influencing distant recurrence

| Variabel  | Crude HR (95% CI)  | Adjusted HR (95% CI) |
|-----------|--------------------|----------------------|
| <b>pT</b> |                    |                      |
| T0,1,2    | 0.37 (0.25 - 0.54) | 0.53 (0.36 - 0.78)   |
| T3        | 1 (ref.)           | 1 (ref.)             |
| T4        | 1.22 (0.75 - 1.98) | 0.93 (0.57 - 1.52)   |
| <b>pN</b> |                    |                      |
| N0        | 1 (ref.)           | 1 (ref.)             |
| N1        | 2.29 (1.60 - 3.28) | 2.00 (1.39 - 2.89)   |
| N2        | 5.32 (3.78 - 7.50) | 4.32 (3.00 - 6.21)   |

pT: Histopathological tumour stage. pN: Histopathological nodal involvement.
